# Supplementary material for: Bacterial community structure in the alcyoniid Lobophytum pauciflorum
Source: Research Square preprint supplement (doi:10.21203/rs.3.rs-2602940/v1), 2023-02-21
Supplement: Supplementary file 1 [file 478d29bd20b9eb65aeb42a06.xlsx]

## Sheet: Alpha Diversity Table
	Alpha Diversity
	Faith’s Phylogenetic Diversity					Pielou’s Evenness
	Colony	Mean		SD		Mean		SD	n
	A	17.2601	±	4.27961		0.694758	±	0.0541038	2
	B	7.19459	±	2.53529		0.571353	±	0.0192188	2
	C	12.1538	±	5.01635		0.616433	±	0.0336194	3
	D	10.1271	±	0.859008		0.617537	±	0.0313857	3
	E	12.9089	±	0.859008		0.605975	±	0.0313857	2
	F	10.5196	±	0.358266		0.641364	±	0.0648143	3
	G	14.1902	±	2.53975		0.547222	±	0.00881844	2
	Faith’s Phylogenetic Diversity
		Inner				Outer				Mucus
	Colony	Mean		SD	n	Mean		SD	n	Mean		sd	n
	H	19.2655	±	0	1	30.7644	±	0	1	65.5911	±	0	1
	I	22.217	±	4.86153	3	18.2855	±	10.5522	3	92.2316	±	33.0386	2
	J	36.0266	±	36.981	3	42.1132	±	17.6869	2	68.5701	±	0	1
	K	20.4901	±	2.33061	3	29.9266	±	4.25947	2	91.2201	±	1.30149	2
	L	17.1729	±	2.6154	3	19.9401	±	6.39119	3	51.9348	±	19.0061	2
	M	32.0681	±	9.76876	3	32.9357	±	23.0251	3	90.7566	±	4.31662	2
	N	21.7745	±	6.93566	2	32.0387	±	5.35841	2	99.8212	±	0	1
	O	30.8817	±	25.9389	2	24.7031	±	15.4226	3	70.8354	±	13.0603	2
	Pielou’s Evenness
	H	0.858893	±	0	1	0.658943	±	0	1	0.669624	±	0	1
	I	0.793968	±	0.0326544	3	0.665302	±	0.1269	3	0.859497	±	0.00745468	2
	J	0.665031	±	0.192914	3	0.816273	±	0.000624735	2	0.803579	±	0	1
	K	0.69547	±	0.117547	3	0.748658	±	0.0692005	2	0.731746	±	0.155179	2
	L	0.758592	±	0.0786497	3	0.775403	±	0.00893536	3	0.579901	±	0.0279201	2
	M	0.755961	±	0.0409889	3	0.722621	±	0.175371	3	0.795982	±	0.0233682	2
	N	0.780152	±	0.00281404	2	0.787499	±	0.0379411	2	0.869866	±	0	1
	O	0.677472	±	0.0649973	2	0.63092	±	0.0671533	3	0.637325	±	0.131923	2
