# Supplementary material for: Bacterial community structure in the alcyoniid Lobophytum pauciflorum
Source: Research Square preprint supplement (doi:10.21203/rs.3.rs-2602940/v1), 2023-02-21
Supplement: Supplementary file 2 [file c85c478c29c31cbf6a6e46e3.xlsx]

## Sheet: Primers
Universal primers
27F	S-D-Bact-0008-d-S-20	AGAGTTTGATCMTGGCTCAG
1492 R	S-*-Univ-1492-a-A-21	GGTTACCTTGTTACGACTT
16S Primers (Illumina tag is underlined)
341F	S-D-Bact-0341-b-S-17	TCGTCGGCAGCGTCAGATGTGTATAAGAGACAGCCTACGGGNGGCWGCAG
785R	S-D-Bact-0785-a-A-21	GTCTCGTGGGCTCGGAGATGTGTATAAGAGACAGGACTACHVGGGTATCTAATCC
